# Supplementary material for: Polyferrocenes: metallopolymers with tunable and high refractive indicesElectronic supplementary information (ESI) available: synthesis of polyferrocenes, film preparation and ellipsometric characterization. See http://www.rsc.org/suppdata/cc/b3/b311934c/
Source: Royal Society of Chemistry journal article supplement (doi:10.1039/b311934c), 2004-01-01
Supplement: b311934c.doc [file b311934c.doc]

Supporting Information

Polyferrocenes: Metallopolymers with Tunable and High Refractive Indices

Chantal Paquet, Paul W. Cyr, Eugenia Kumacheva* and Ian Manners*

University of Toronto, Department of Chemistry, 80 St. George Street, Toronto, Ontario, Canada, M5S 3H6

**Polyferrocene synthesis**

All reactions were performed in a N2 atmosphere using either standard Schlenk techniques or a N2-atmosphere glovebox and using solvents dried and deoxygenated by standard methods. Dilithioferrocene (FcLi2) and [1]ferrocenophanes were prepared as described in the literature.1-4 All polyferrocenylsilane polymers were prepared by transition metal catalyzed ring-opening polymerization (ROP) of [1]silaferrocenophane monomers. The polyferrocenylgermane was prepared by thermal polymerization of [1]germaferrocenophane in toluene at 80C. The [1]stannaferrocenophane underwent ROP in the melt in a sealed evacuated Pyrex tube at 150C for 30 minutes to give polyferrocenylstannane. Polyferrocenylphosphine was prepared by anionic ROP with n-BuLi in THF followed by quenching with H2O. Polyferrocenylphosphinesulfides were prepared by sulfurizing polyferrocenylphosphine with S8.

All polymers were characterized by 1H NMR and gel permeation chromatography (GPC). The molecular weights (Mn) determined from GPC and calibrated to polystyrene standards were 143 000g/mol (PDI=2.1) for 1b, 147 800 g/mol (PDI=1.9) for 1d, 59 300 g/mol (PDI=7.1) for 1a, 161 900g/mol (PDI=2.2) for 2, 71 200 g/mol (PDI=2.0) for 3a, 116 900 g/mol (PDI=2.4) for 3b, 10 000g/mol (PDI=1.3) for 4 and 11 000 g/mol (PDI=1.3) for 5.

**Film Preparation**

Films of polyferrocenes were prepared by spin coating polymer solution (2-5 wt % in chlorobenzene or toluene) on single-side polished silicon substrates. The films were heated in an oven at 150C for 1 hour to eliminate any residual solvent. The approximate film thickness and surface roughness were determined with a Dektak3 profilometer.

**Ellipsometry**

A Sopra (GES-5) spectroscopic ellipsometer with a wavelength tunability of 250 to 2000nm was used. Data was acquired in units of eV, using the analyzer in a previous tracking mode and with the integration time for each data point being determined by either the miminum threshold of 2000000 detector counts or 10 seconds.

The Levenberg-Marquardt regression algorithm was used to find the minimum difference between the acquired Y and D curves and the data generated from an optical model. The model consisted of a 3 layers; a homogenous crystalline Si substrate, a 2 nm SiO2 layer, and the polymer layer. The polymer layer was in turn described by a Cauchy dispersion law with one Lorentz peak superimposed. Starting parameters included the thickness found from profilometry, the peak position and width for the d-d transition of the polymer determined from UV-Vis spectroscopy. For each polyferrocene derivative, 3 samples of different thicknesses were analyzed.

(1) Foucher, D. A.; Ziembinski, R.; Tang, B.-Z.; Macdonald, P. M.; Massey, J.; Jaeger, C. R.; Vansco, G. J.; Manners, I. *Macromolecules* **1993**, *26*, 2878-2884.

(2) Jäkle, F.; Rulkens, R.; Zech, G.; Foucher, D. A.; Lough, A. J.; Manners, I. *Chem. Eur. J.* **1998**, *4*, 2117-2128.

(3) Foucher, D. A.; Edwards, M.; Burrow, R. A.; Lough, A. J.; Manners, I. *Organometallics* **1994**, *13*, 4959-4966.

(4) Peckham, T. J.; Massey, J. A.; Honeyman, C. H.; Manners, I. *Macromolecules* **1999**, *32*, 2830-2837.
